# Supplementary material for: Multiscale investigation of mealiness in apple: an atypical role for a pectin methylesterase during fruit maturation
Source: PubMed Central journal article supplement (PMC4310206; doi:10.1186/s12870-014-0375-3), 2014-12-31

**Additional file 3. Validation of microarrays results by quantitative real-time PCR (qRT-PCR)**

**S2.A:** Validation of microarrays results by quantitative real-time PCR (qRT-PCR) for selected genes for 2 pairs of genotypes at two time points. Reported ratios were calculated on the basis of normalized data for microarray analyses (log<sub>2</sub> ratio) and as normalized expression for qPCR (Ct ratio). H: harvest, DAH: days after harvest.

| stage  | Couple    | MDP number    | Gene annotation  | qRT-PCR (Ct Ratio) | Microarray (log <sub>2</sub> ratio) |
|--------|-----------|---------------|------------------|--------------------|-------------------------------------|
| H      | M74 / M20 | MDP0000222620 | AtPME2           | -2.12              | -1.9                                |
| H      | M74 / M20 | MDP0000322658 | UDP-glucuronosyl | -6.17              | -2.58                               |
| H      | M74 / M20 | MDP0000393227 | FQR1             | -3.82              | -2.45                               |
| H      | M74 / M20 | MDP0000671440 | GDH1             | -1.8               | -1.07                               |
| H      | M74 / M20 | MDP0000303194 | CRK10            | 8.16               | 3.17                                |
| 60 DAH | M74 / M20 | MDP0000222620 | AtPME2           | -2.67              | -1.62                               |
| 60 DAH | M74 / M20 | MDP0000393227 | FQR1             | -0.3               | 0.06                                |
| 60 DAH | M74 / M20 | MDP0000671440 | GDH1             | -2.49              | -0.85                               |
| 60 DAH | M74 / M20 | MDP0000303194 | CRK10            | 7.24               | 2.06                                |
| 60 DAH | M74 / M20 | MDP0000322658 | UDP-glucuronosyl | -11.03             | -2.48                               |
| H      | M40 / M49 | MDP0000322658 | UDP-glucuronosyl | -9.37              | -2.6                                |
| H      | M40 / M49 | MDP0000393227 | FQR1             | -3.56              | -2.68                               |
| H      | M40 / M49 | MDP0000303194 | CRK10            | 4.12               | 3.22                                |
| 60 DAH | M40 / M49 | MDP0000222620 | AtPME2           | -3.34              | -3.92                               |
| 60 DAH | M40 / M49 | MDP0000393227 | FQR1             | -3.73              | -2.52                               |
| 60 DAH | M40 / M49 | MDP0000322658 | UDP-glucuronosyl | -5.99              | -3.26                               |

**S2.B:** Correlation between qRT-PCR ratios and microarray log<sub>2</sub> ratios is shown for the same genes, along with Pearson correlation coefficient.

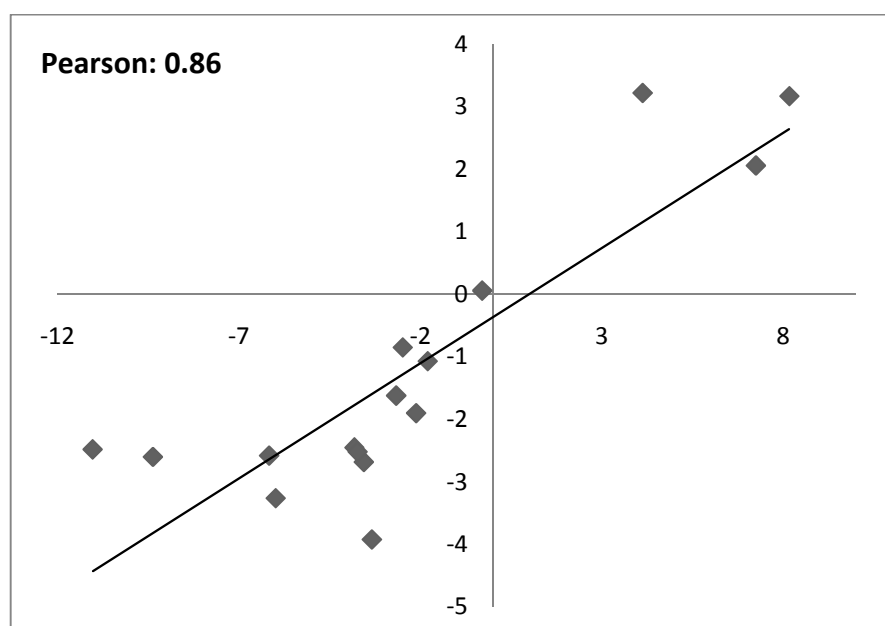

Supplement: 12870_2014_375_MOESM3_ESM.pdf [file 12870_2014_375_MOESM3_ESM.pdf]
