# Supplementary material for: Multiscale investigation of mealiness in apple: an atypical role for a pectin methylesterase during fruit maturation
Source: PubMed Central journal article supplement (PMC4310206; doi:10.1186/s12870-014-0375-3), 2014-12-31

**Additional file 8. Pectin enzymatic profiling results.**

**S8.A Sum up of significant differences between mealy and non-mealy fruits for each oligouronide during the complete apple fruit cycle according to Kruskal-Wallis tests.**

The oligouronides were identified from MALDI-TOF MS spectra after pectin-lyase hydrolysis of cell wall preparations. Oligouronides nomenclature is described in the materials and methods. Colors refer to significant differences ( $p\text{-value} < 0.05$ ) between mealy and non-mealy hybrids: dark grey is for a higher abundance in mealy fruits, light grey: a higher abundance in non-mealy fruits.

**S8.B Bar charts of abundance of each oligouronides for mealy (M40, M74) and non-mealy (M49, M74) hybrids at the four fruit developmental stages** obtained from MALDI-TOF MS spectra after pectin-lyase hydrolysis of cell wall preparations. Oligouronides nomenclature is described in the materials and methods. Letters on bar charts indicate groups of significantly different abundance (Kruskal-Wallis test). M: mealy; NM: non-mealy.

**S8.A**

| oligourinodes | 100 DAF   | H          | 60 DAH    | 120 DAH   |
|---------------|-----------|------------|-----------|-----------|
| DU4m2         | Dark Grey | Dark Grey  | White     | Dark Grey |
| DU4m3         | Dark Grey | Dark Grey  | White     | Dark Grey |
| DU5m3         | Dark Grey | Dark Grey  | Dark Grey | Dark Grey |
| DU5m4         | White     | Dark Grey  | Dark Grey | Dark Grey |
| DU4m3a1       | Dark Grey | Dark Grey  | Dark Grey | Dark Grey |
| DU6m1a1       | Dark Grey | Dark Grey  | Dark Grey | Dark Grey |
| DU6m2a1       | Dark Grey | Dark Grey  | Dark Grey | Dark Grey |
| DU7m2a1       | White     | Dark Grey  | Dark Grey | Dark Grey |
| DU7m3a1       | White     | Dark Grey  | Dark Grey | Dark Grey |
| DU6m3a1       | White     | Light Grey | White     | White     |
| DU5m2a1       | White     | Light Grey | White     | Dark Grey |
| DU5m4a1       | White     | White      | Dark Grey | Dark Grey |
| DU6m2a2       | White     | White      | Dark Grey | Dark Grey |
| DU6m4a1       | White     | White      | White     | Dark Grey |
| DU7m3a2       | White     | White      | White     | White     |

S8.B

DU4m2

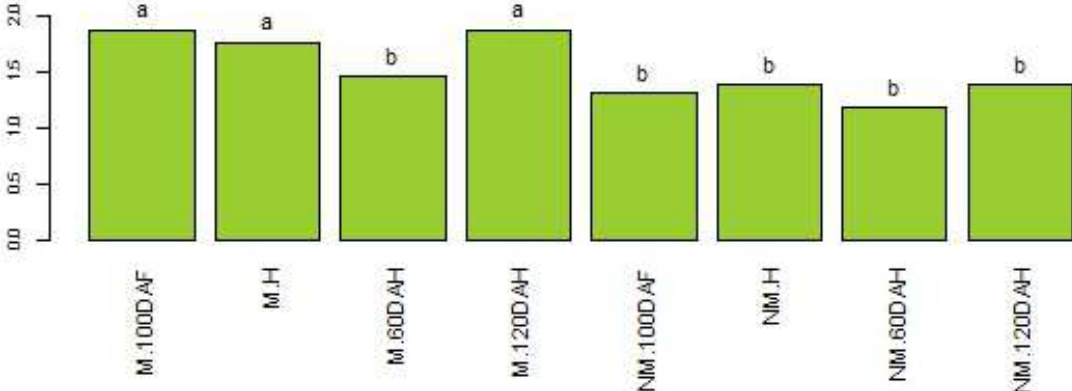

DU4m3

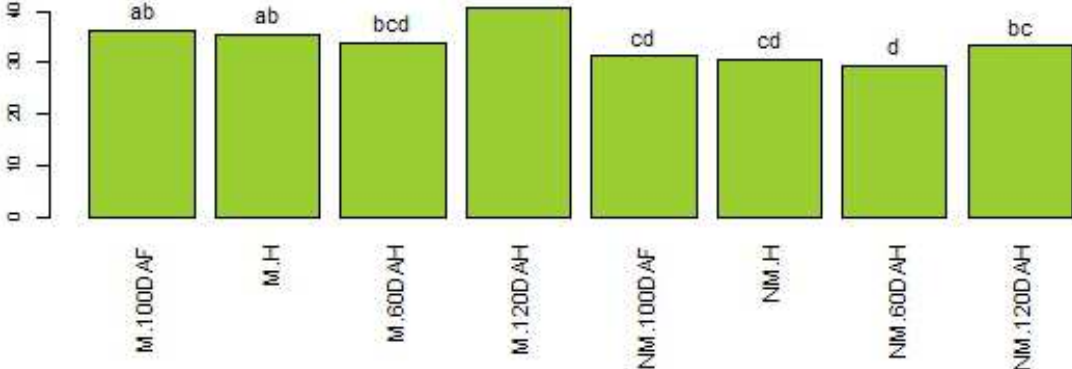

DU4m3a1

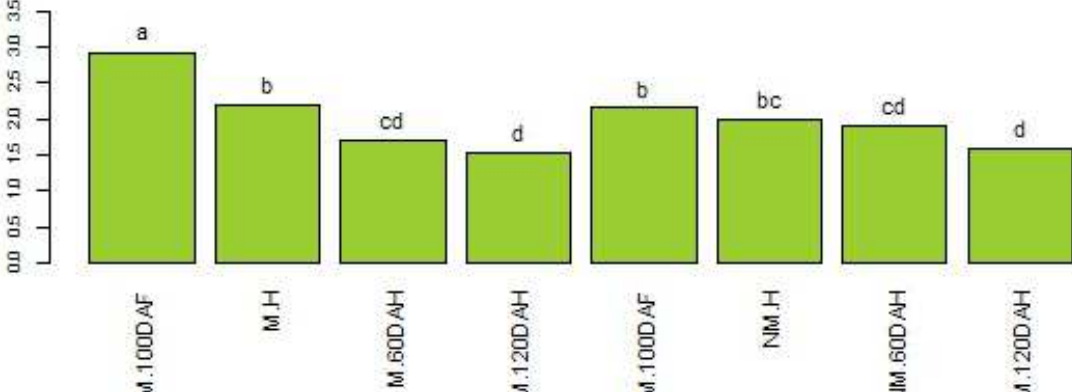

DU5m3

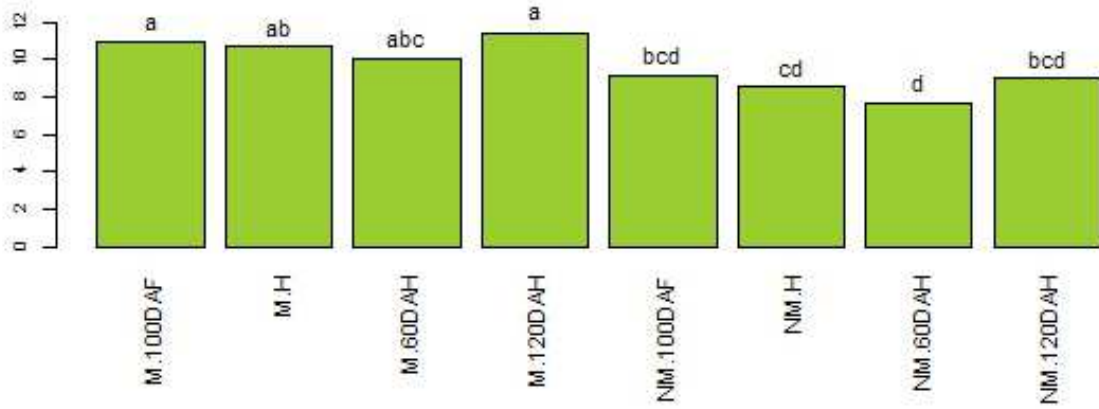

DU5m4

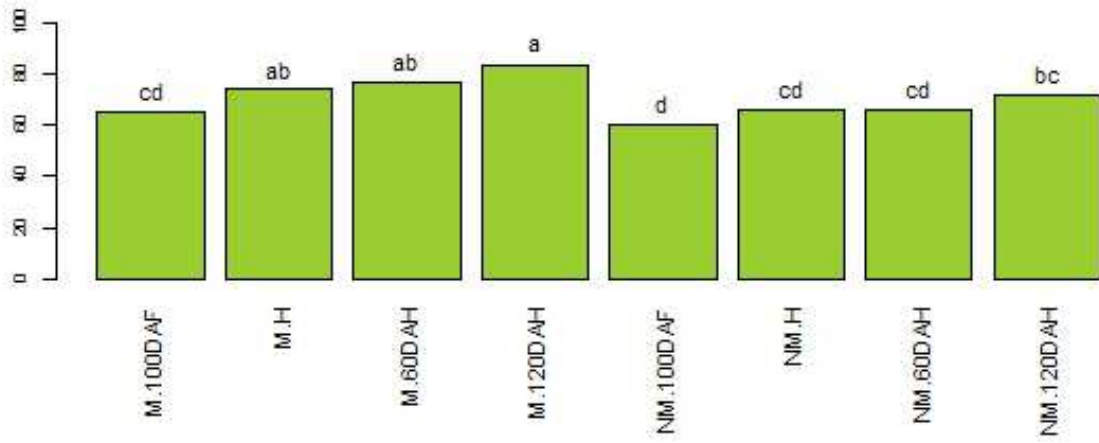

DU5m2a1

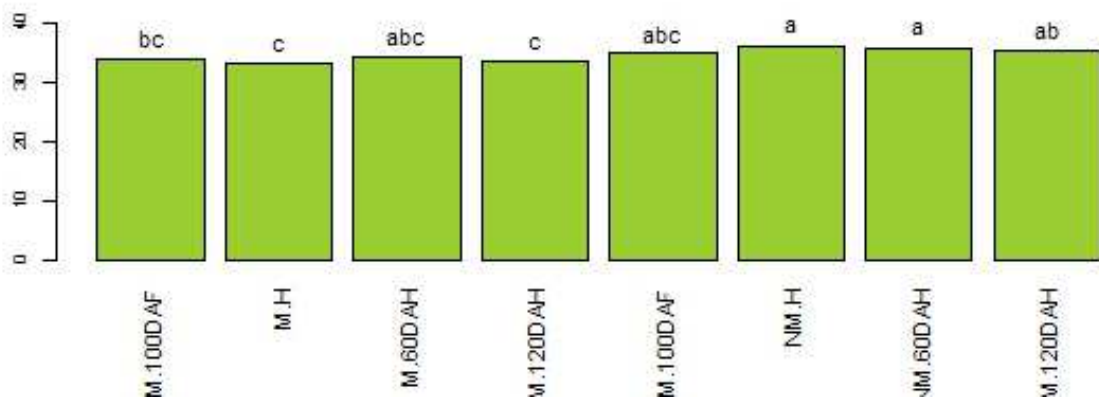

DU5m4a1

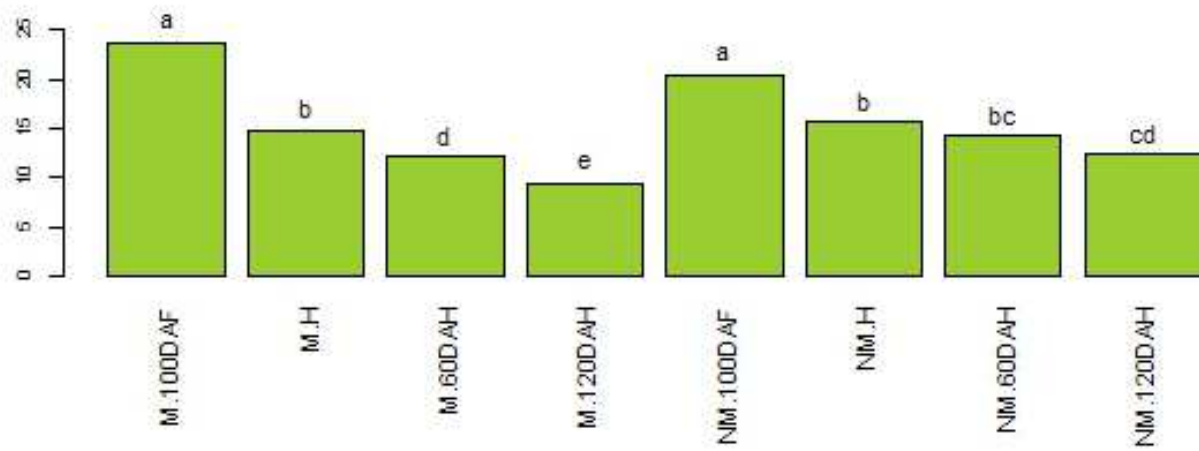

DU6m1a1

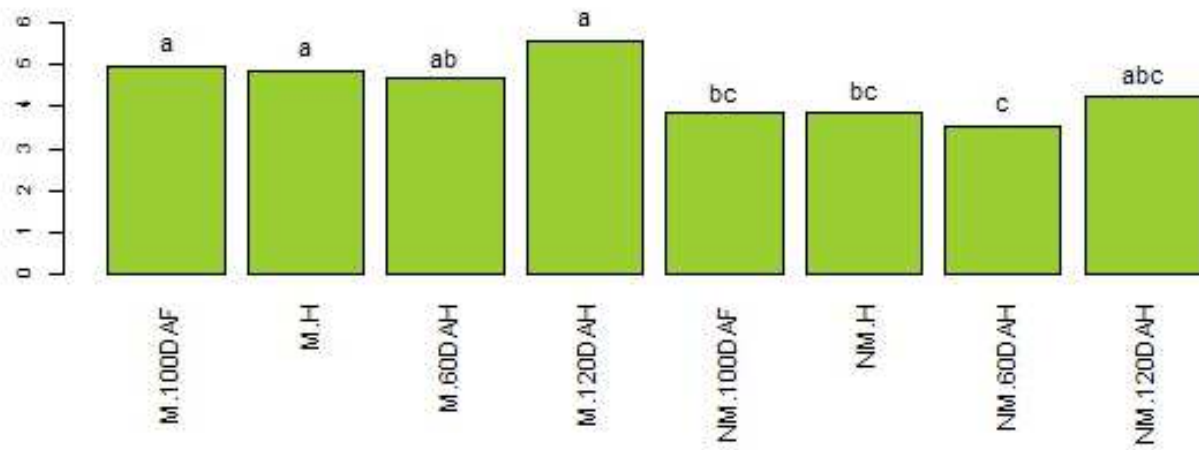

DU6m2a1

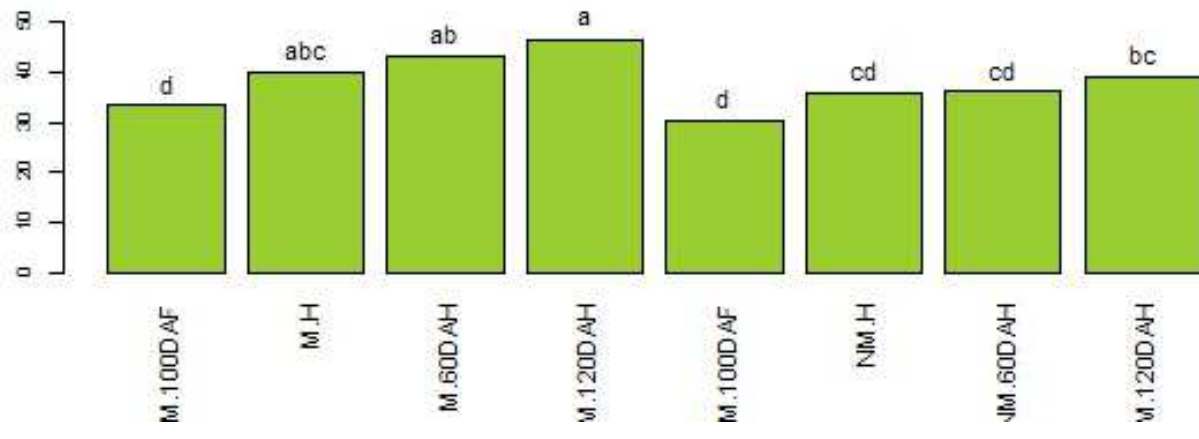

DU6m3a1

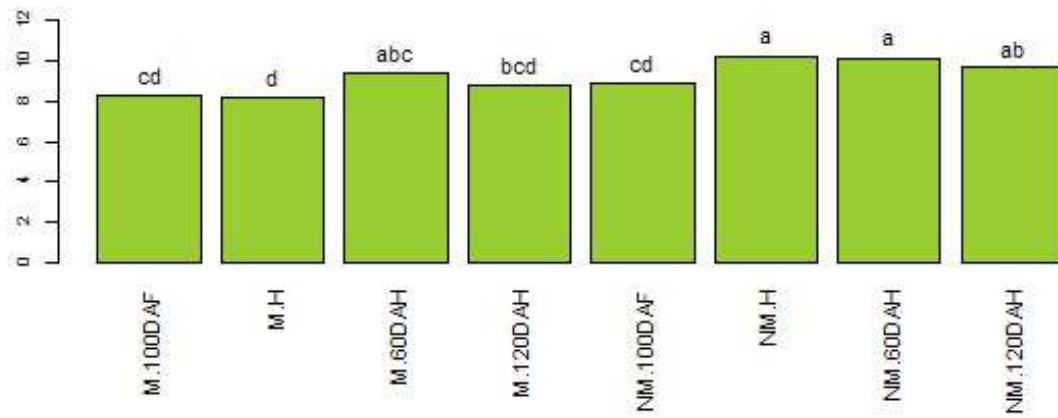

DU6m4a1

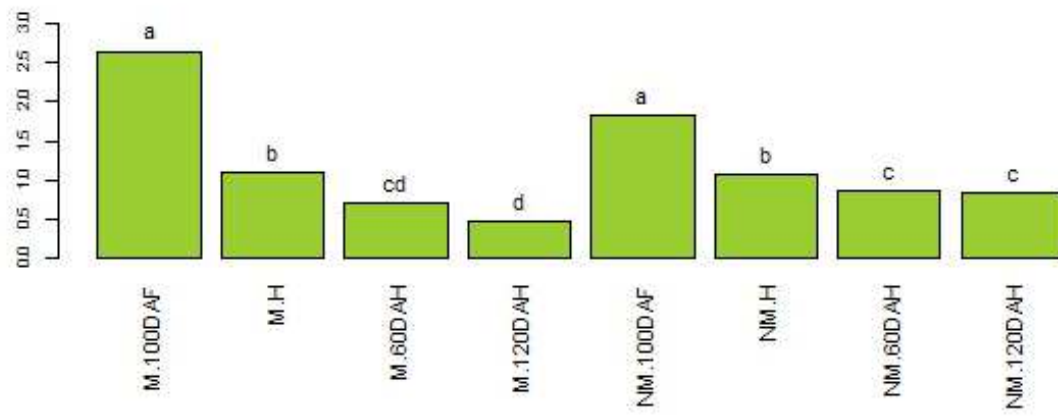

DU6m2a2

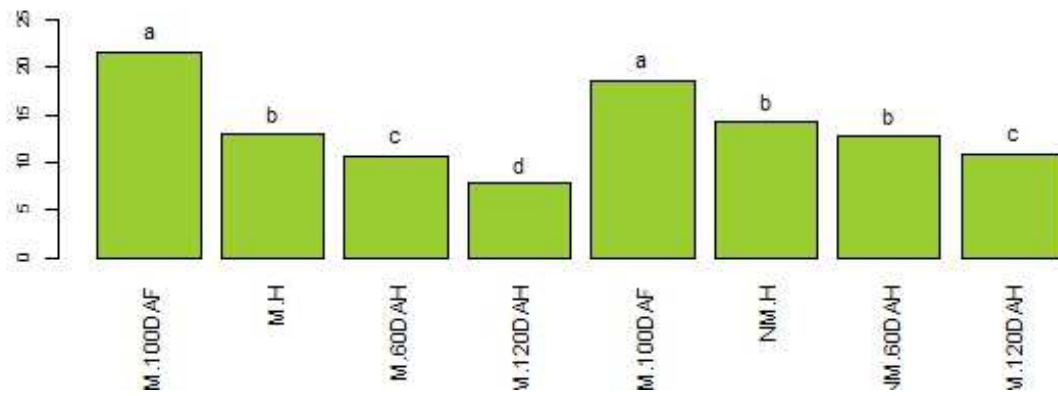

DU7m2a1

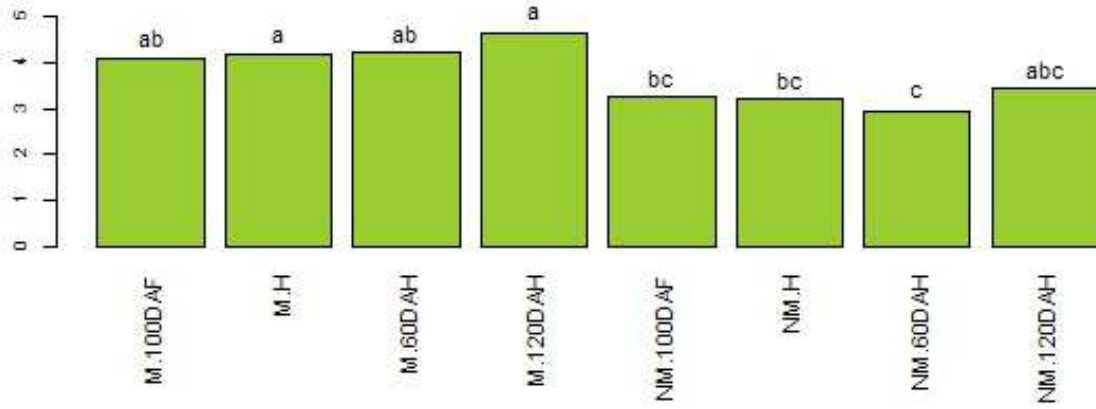

DU7m3a1

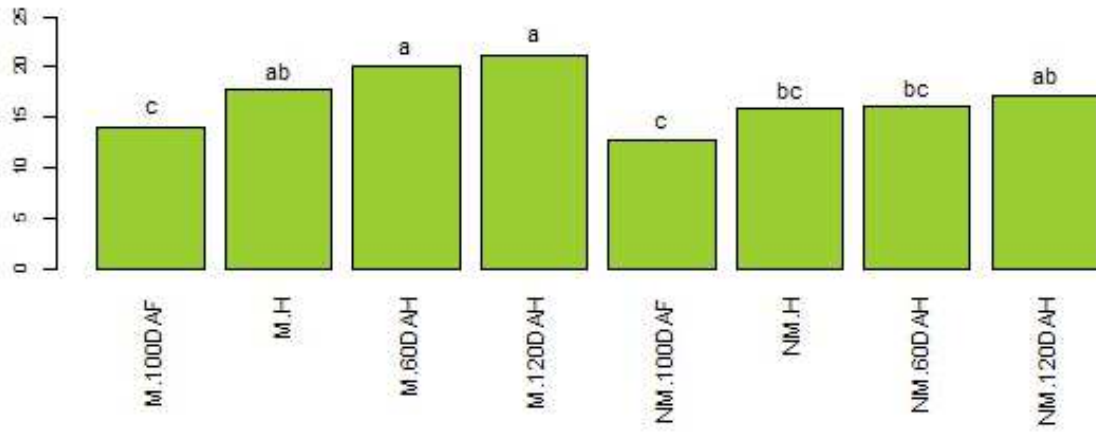

DU7m3a2

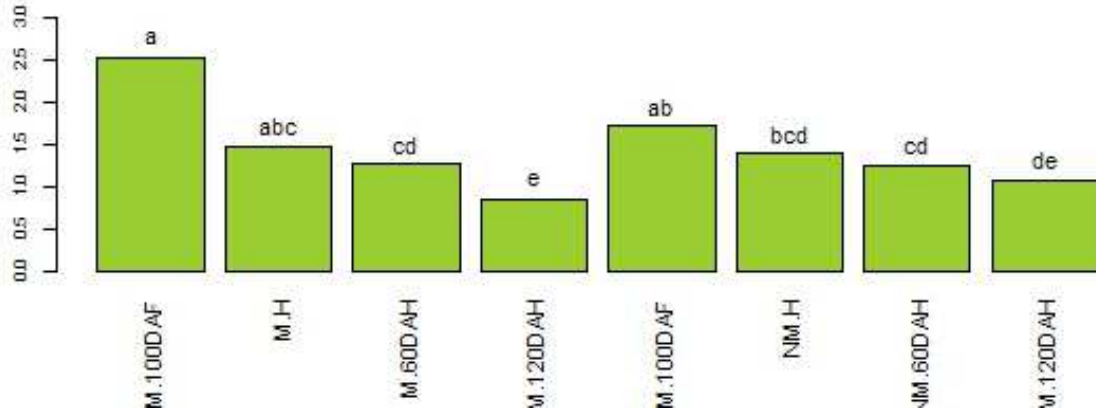

Supplement: 12870_2014_375_MOESM8_ESM.pdf [file 12870_2014_375_MOESM8_ESM.pdf]
