# Supplementary material for: Multiscale investigation of mealiness in apple: an atypical role for a pectin methylesterase during fruit maturation
Source: PubMed Central journal article supplement (PMC4310206; doi:10.1186/s12870-014-0375-3), 2014-12-31
Supplement: 12870_2014_375_MOESM4_ESM.pdf [file 12870_2014_375_MOESM4_ESM.pdf]

#### Additional File 4: Ethylene measurements during storage

##### Materials and Methods:

The fruits were sampled in 2010 and 2011 for ethylene quantification during storage. Ten fruits were transferred to a hermetically closed container and ethylene contents were analysed using an Ethylene Atmosphere Sampling Instrument (EASI-1, Absoger France). To identify any statistical differences between mealy and non-mealy apples, student tests were performed at each time point.

##### Results:

Ethylene accumulation in fruits from individual hybrids. The values represent the mean of 10 measurements. Results of student test at each time point between mealy and non-mealy are mentioned below.

| Phenotype | Hybrid | 2010 |        | 2011  |        |
|-----------|--------|------|--------|-------|--------|
|           |        | H    | 60DAH  | 60DAH | 120DAH |
| NM        | M16    | 0,17 | 33,92  | 5,11  | 44,10  |
| NM        | M20    | 0,88 | 2,61   | -0,64 | -1,79  |
| NM        | M49    | 0,65 | 5,49   | 0,87  | 29,71  |
| M         | M40    | 1,94 | 5,25   | 0,77  | 6,81   |
| M         | M48    | 1,41 | 59,87  | 27,26 | 61,12  |
| M         | M74    | 6,89 | 103,82 | 31,16 | 36,14  |

Results of student test:                      0,24                      0,38                      0,25                      0,75
