# Supplementary material for: Multiscale investigation of mealiness in apple: an atypical role for a pectin methylesterase during fruit maturation
Source: PubMed Central journal article supplement (PMC4310206; doi:10.1186/s12870-014-0375-3), 2014-12-31
Supplement: 12870_2014_375_MOESM5_ESM.pdf [file 12870_2014_375_MOESM5_ESM.pdf]

|                    |             |             |             |             |             |            |                  |
|--------------------|-------------|-------------|-------------|-------------|-------------|------------|------------------|
|                    |             | 20          |             | 40          |             | 60         |                  |
| MdPME2             | ATGGCCAAA   | TCAAAGAGTT  | TTTAGCCAGA  | ATGTCCGAAT  | CAGGCCAAAA  | ATTATCCACA | AACAAGAAGA 70    |
| MDP245813_cds_GDR  | ATGGCCAAAC  | TCAAAGAGTT  | TTTAGCCAGA  | ATGTCCGAAT  | CAGGCCAAAA  | ATTATCCACA | AACAAGAAGA 70    |
| MDP222620_cds_GDR  | ATGGCCAAA   | TCAAAGAGTT  | TTTAGCCAAA  | ATGTCCGAAT  | CGGGCAAAACA | AATATCCACA | AACAAGAAAC 70    |
| AryANE_v1_00021521 | -----       | -----       | -----       | -----       | -----       | -----      | -                |
|                    |             | 80          |             | 100         |             | 120        |                  |
| MdPME2             | ACAAGAAGCT  | CTTCATATCC  | CTTTTCGCAA  | CCATCCTACT  | CGTGGGCGCC  | GTCATCGGCA | TTGTCACCGG 140   |
| MDP245813_cds_GDR  | ACAAGAAGCT  | CTTCATATCC  | CTTTTCGCAA  | CCATCCTACT  | CGTGGGCGCC  | GTCATCGGCA | TTGTCACCGG 140   |
| MDP222620_cds_GDR  | ACAAGAAGCT  | CTTCATATCC  | CTTTTCGCAA  | CCATCCTACT  | AGTCGGCGCC  | ATCGTCGGCA | TTGTCACCGG 140   |
| AryANE_v1_00021521 | -----       | -----       | -----       | -----       | -----       | -----      | -                |
|                    |             | 160         |             | 180         |             | 200        |                  |
| MdPME2             | AGTAAAGTCC  | TCCAAAAACA  | ACTCCGACGA  | CGAAACCATC  | GAGGCCTCCC  | ACGCCATAGT | CAAATCCTCA 210   |
| MDP245813_cds_GDR  | AGTAAAGTCC  | TCCAAAAACA  | ACTCCGACGA  | CGAAACCATC  | GAGGCCTCCC  | ACGCCATAGT | CAAATCCTCA 210   |
| MDP222620_cds_GDR  | AGTCAAGTCC  | TCCAAAAACA  | ACTCCGACGA  | CGAAACCAAC  | GAGGCCTCCC  | ACGCCATAGT | CAAATCCTCA 210   |
| AryANE_v1_00021521 | -----       | -----       | -----       | -----       | -----       | -----      | -                |
|                    |             | 220         |             | 240         |             | 260        |                  |
| MdPME2             | TGCAGCTCCA  | CCCTCTACCC  | TGATCTGTGC  | TTTTCAACTC  | TTGCCCTTCA  | CCCGGAAGCC | TCCAAAAAGG 280   |
| MDP245813_cds_GDR  | TGCAGCTCCA  | CCCTCTACCC  | TGATCTGTGC  | TTTTCAACTC  | TTGCCCTTCA  | CCCGGAAGCC | TCCAAAAAGG 280   |
| MDP222620_cds_GDR  | TGCAGCTCCA  | CCCTCTACCC  | TGAACTGTGC  | TTTTCCACTC  | TTGCACCTCA  | CCCGGAAGCC | GCCAAAAAGG 280   |
| AryANE_v1_00021521 | -----       | -----       | -----       | -----       | -----       | -----      | -                |
|                    |             | 300         |             | 320         |             | 340        |                  |
| MdPME2             | TTTCGAGCCA  | GAAGGACGTG  | ATAGAATTGT  | CACTGAACAT  | CACGACCACG  | GCGGTGCAGC | ACATCTTCTT 350   |
| MDP245813_cds_GDR  | TTTCGAGCCA  | GAAGGACGTG  | ATAGAATTGT  | CACCTGAACAT | CACGACCACG  | GCGGTGCAGC | ACATCTTCTT 350   |
| MDP222620_cds_GDR  | TTTCGAGCCA  | GAAGGACGTG  | ATAGAATTGT  | CATTGAACAT  | CACGACCAAG  | GCGGTTCAGC | ACAACCTTCTT 350  |
| AryANE_v1_00021521 | -----       | -----       | -----       | -----       | -----       | -----      | -                |
|                    |             | 360         |             | 380         |             | 400        |                  |
| MdPME2             | CACCGTCTGAG | AAGCTGCTGA  | AGTCCAGGAA  | GAACAAGCTC  | ACTAAGCGTG  | AGAAGGGGCG | TCTCCACGAC 420   |
| MDP245813_cds_GDR  | CACYGTCTGAG | AAGCTGCTGA  | AGTCCAGGAA  | GAACAAGCTC  | ACTAAGCGTG  | AGAAGGGGCG | TCTCCACGAC 420   |
| MDP222620_cds_GDR  | CACTGTCTGAG | AAGCTGCTGA  | AGTCCAGGAA  | GAATAAGCTC  | ACTAAGCGTG  | AGAAGGGGCG | TCTTCACGAC 420   |
| AryANE_v1_00021521 | -----       | -----       | -----       | -----       | -----       | -----      | -                |
|                    |             | 440         |             | 460         |             | 480        |                  |
| MdPME2             | TGTTTGAGAGA | CCATTGACGA  | AACCCCTCGAC | GAGCTCCACG  | AGGCTGTGCGA | GGATCTCCAT | GAGTACCCCA 490   |
| MDP245813_cds_GDR  | TGTTTGAGAGA | CCATTGACGA  | AACCCCTCGAC | GAGCTCCACG  | AGGCTGTGCGA | GGATCTCCAT | GAGTACCCCA 490   |
| MDP222620_cds_GDR  | TGTTTGAGAGA | CCATTGATGA  | AACCTCTCGAC | GAGCTTCACG  | ATGCTGTGGA  | GGACCTCCAT | GAGTACCCCA 490   |
| AryANE_v1_00021521 | -----       | -----       | -----       | -----       | -----       | -----      | -                |
|                    |             | 500         |             | 520         |             | 540        |                  |
| MdPME2             | ATAACAAGAC  | TTTGGTTTCA  | CATGCTGATG  | ACCTTAAAC   | TTTGCTAAGC  | TCCGCCATTA | CCAACCAAGA 560   |
| MDP245813_cds_GDR  | ATAACAAGAC  | TTTGGTTTCA  | CATGCTGATG  | ACCTTAAAC   | TTTGMTAAGC  | TCCGCCATTA | CCAACCAAGA 560   |
| MDP222620_cds_GDR  | ATAAGAAGAC  | TTTGACTCAG  | CATGCGGATG  | ACCTAAAAAC  | TTTGATCAGC  | TCCGCCATTA | CCAACCAAGA 560   |
| AryANE_v1_00021521 | -----       | -----       | -----       | -----       | -----       | -----      | -                |
|                    |             | 580         |             | 600         |             | 620        |                  |
| MdPME2             | AACTTGCTTT  | AATGGGTTCT  | CTCATGATGG  | AGGTGATAAG  | AAAGTTAGGA  | AAGTTTTGTT | GGCTGGTGAG 630   |
| MDP245813_cds_GDR  | AACTTGCTTT  | AATGGGTTCT  | CTCATGATGG  | AGGTGATAAG  | AAAGTTAGGA  | AAGTTTTGTT | GGCTGGTGAG 630   |
| MDP222620_cds_GDR  | AACTTGCTTT  | GCTGGGTTCT  | CGCACGATGA  | TGCTGATAAA  | AAAGTTAGGA  | AAGTTTTTTT | GGCGGGTCTAG 630  |
| AryANE_v1_00021521 | -----       | -----       | -----       | -----       | -----       | -----      | -                |
|                    |             | 640         |             | 660         |             | 680        |                  |
| MdPME2             | -----       | -----       | -----       | -----       | -----       | GAACACATA  | GAAAAATTGT 649   |
| MDP245813_cds_GDR  | ACCGTCRATA  | TYTCTKTTAA  | CACCGATATT  | TRAACAATTG  | CGGTCACTCA  | GGAACACATA | GAAAAATTGT 700   |
| MDP222620_cds_GDR  | -----       | -----       | -----       | -----       | -----       | GTGCACGTA  | GAAAAATTGT 649   |
| AryANE_v1_00021521 | -----       | -----       | -----       | -----       | -----       | -----      | -                |
|                    |             | 720         |             | 740         |             | 760        |                  |
| MdPME2             | GCAGTAATGT  | ACTGGCCATG  | ATCAAGAACA  | TGACCGATAC  | CGACATTGCA  | AACGAGATGA | AAATGAATGT 719   |
| MDP245813_cds_GDR  | GCAGTAATGT  | ACTGGCCATG  | ATCAAGAACA  | TGACCGATAC  | CGACATTGCA  | AACGAGATGA | AAATGAATGT 770   |
| MDP222620_cds_GDR  | GCAGTAATGC  | GCTGGCCATG  | ATCAAGAACA  | TGACCGATAC  | CGACATTGCA  | AACGAGATGA | AAACGAATGT 719   |
| AryANE_v1_00021521 | -----       | -----       | -----       | -----       | -----       | -----      | -                |
|                    |             | 780         |             | 800         |             | 820        |                  |
| MdPME2             | GAACCGAAAA  | CTCAAGGAGA  | ATATGGTGGA  | CGAGCACGGG  | TGGCCGGAGT  | GGCTGTCGGT | GGCGGACAGG 789   |
| MDP245813_cds_GDR  | GAACCGAAAA  | CTCAAGGAGA  | ATATGGTGGA  | CGAGCACGGG  | TGGCCGGAGT  | GGCTGTCGGT | GGCGGACAGG 840   |
| MDP222620_cds_GDR  | GAACCGAAAG  | CTGAAGGAGG  | ATGTGGTGGA  | CGAGCATGGG  | TGGCCGGAGT  | GGCTGTCGGT | GGCAGACAGG 789   |
| AryANE_v1_00021521 | -----       | -----       | -----       | -----       | -----       | -----      | -                |
|                    |             | 860         |             | 880         |             | 900        |                  |
| MdPME2             | CGACTGCTGC  | AGTCGTCTTC  | TGTCACGCCG  | AATGTGGTGG  | TGGCAGCAGA  | CGGCACTGGG | AACTACAAGA 859   |
| MDP245813_cds_GDR  | CGACTGCTGC  | AGTCGTCTTC  | TGTCACGCCG  | AATGTGGTGG  | TGGCAGCAGA  | CGGCACTGGG | AACTACAAGA 910   |
| MDP222620_cds_GDR  | CGACTGCTGC  | AGTCGTCTTC  | TGTCACACCA  | AATGTGGTGG  | TGGCAGCAGA  | CGGGAGTGGG | AACTACAAGA 859   |
| AryANE_v1_00021521 | -----       | -----       | -----       | -----       | -----       | -----      | -                |
|                    |             | 920         |             | 940         |             | 960        |                  |
| MdPME2             | CGGTGTCGGA  | AGCGGTGGCT  | GCTGCCCCAG  | AGAAGAGTAG  | TAGCAGATAC  | GTGATTAATA | TAAAGGCGGG 929   |
| MDP245813_cds_GDR  | CGGTGTCGGA  | AGCGGTGGCT  | GCTGCCCCAG  | AGAAGAGTAG  | TAGCAGATAC  | GTGATTAATA | TAAAGGCGGG 980   |
| MDP222620_cds_GDR  | CGGTGTCGGC  | TGCGGTGGCT  | GCCGCCCCGG  | AGAAGAGCAG  | TAAAAGATAT  | GTGATTAGAA | TAAAGGCGGG 929   |
| AryANE_v1_00021521 | -----       | -----       | -----       | -----       | -----       | -----      | -                |
|                    |             | 1 000       |             | 1 020       |             | 1 040      |                  |
| MdPME2             | GATTTATAGA  | GAAAAATGTTG | ACGTGCCAAA  | GAAAAAGACC  | AACATTATGT  | TTTTGGGAGA | TGGGAGGGTA 999   |
| MDP245813_cds_GDR  | GATTTATAGA  | GAAAAATGTTG | ACGTGCCAAA  | GAAAAAGACC  | AACATTATGT  | TTTTGGGAGA | TGGGAGGGTA 1050  |
| MDP222620_cds_GDR  | GGTTTATAGA  | GAAAAATGTTG | ACGTGCCGAA  | GAAAAAGACC  | AACATTATGT  | TTATGGGAGA | TGGGAGAAAA 999   |
| AryANE_v1_00021521 | -----       | -----       | -----       | -----       | -----       | -----      | -                |
|                    |             | 1 060       |             | 1 080       |             | 1 100      |                  |
| MdPME2             | AACACCATCA  | TCACTGCTAG  | TAGAAATGTC  | GTCGATGGCA  | GCACAACCTT  | CAACTCAGCC | ACAGTTGC -- 1067 |
| MDP245813_cds_GDR  | AACACCATCA  | TCACTGCTAG  | TAGAAATGTC  | GTCGATGGCA  | GCACAACCTT  | CAACTCAGCC | ACAGTTGC -- 1118 |
| MDP222620_cds_GDR  | AACACTATCA  | TCACTGCTAG  | TAAAAATGTG  | GTCGATGGCA  | GCACAACCTT  | CAACTCGGCC | ACAGTTGTGA 1069  |
| AryANE_v1_00021521 | -----       | -----       | AAAATGTG    | GTCGATGGCA  | GCACAACCTT  | CAACTCGGCC | ACAGTTGTGA 48    |

|                    |            |              |              |            |              |               |            |       |
|--------------------|------------|--------------|--------------|------------|--------------|---------------|------------|-------|
|                    |            | 1 140        |              | 1 160      |              | 1 180         |            |       |
| MdPME2             | TGCG-GT-TG | G- - - TGAGA | AGTTTCTAGC   | CCGAGACATA | ACATTCCAAA   | ACACAGCAGG    | CCCATCAAAG | 1131  |
| MDP245813_cds_GDR  | TGCG-GT-TG | G- - - TGAGA | AGTTTCTAGC   | CCGAGACATA | ACATTCCAAA   | ACACAGCAGG    | CCCATCAAAG | 1182  |
| MDP222620_cds_GDR  | TGTATGTATG | TACMTTGAGG   | ATTTTTT- - - | TCGGAWTCT  | - C- TTTTGGA | TCTTAG- - - - | - - - - -  | 1119  |
| AryANE_v1_00021521 | TGTATGTATG | TA- - - - -  | - - - - -    | - - - - -  | - - - - -    | - - - - -     | - - - - -  | 60    |
|                    |            | 1 200        |              | 1 220      |              | 1 240         |            | 1 260 |
| MdPME2             | CACCAAGCTG | TTGCCCTAAG   | AGTTGGGTCC   | GATCTCTCAG | CATTCTACCG   | CTGCGACATT    | CTTGCGTACC | 1201  |
| MDP245813_cds_GDR  | CACCAAGCTG | TTGCCCTAAG   | AGTTGGGTCC   | GATCTCTCAG | CATTCTACCG   | CTGCGACATT    | CTTGCGTACC | 1252  |
| MDP222620_cds_GDR  | - - - - -  | - - - - -    | - - - - -    | - - - - -  | - - - - -    | - - - - -     | - - - - -  | 1119  |
| AryANE_v1_00021521 | - - - - -  | - - - - -    | - - - - -    | - - - - -  | - - - - -    | - - - - -     | - - - - -  | 60    |
|                    |            | 1 280        |              | 1 300      |              | 1 320         |            |       |
| MdPME2             | AAGACTCGCT | CTACGTGCAC   | TCGAATCGCC   | AGTTTTTTGA | AGGCTGCTTG   | GTAGCCGGAA    | CAGTTGACTT | 1271  |
| MDP245813_cds_GDR  | AAGACTCGCT | CTACGTGCAC   | TCGAATCGCC   | AGTTTTTTGA | AGGCTGCTTG   | GTAGCCGGAA    | CAGTTGACTT | 1322  |
| MDP222620_cds_GDR  | - - - - -  | - - - - -    | - - - - -    | - - - - -  | - - - - -    | - - - - -     | - - - - -  | 1119  |
| AryANE_v1_00021521 | - - - - -  | - - - - -    | - - - - -    | - - - - -  | - - - - -    | - - - - -     | - - - - -  | 60    |
|                    |            | 1 340        |              | 1 360      |              | 1 380         |            | 1 400 |
| MdPME2             | CATCTTCGGC | AATGCTGCTG   | TCGTGTTACA   | AAATTGTGAC | ATCCATGCAA   | GAAAACCTGA    | TTCGGGCCAG | 1341  |
| MDP245813_cds_GDR  | CATCTTCGGC | AATGCTGCTG   | TCGTGTTACA   | AAATTGTGAC | ATCCATGCAA   | GAAAACCTGA    | TTCGGGCCAG | 1392  |
| MDP222620_cds_GDR  | - - - - -  | - - - - -    | - - - - -    | - - - - -  | - - - - -    | - - - - -     | - - - - -  | 1119  |
| AryANE_v1_00021521 | - - - - -  | - - - - -    | - - - - -    | - - - - -  | - - - - -    | - - - - -     | - - - - -  | 60    |
|                    |            | 1 420        |              | 1 440      |              | 1 460         |            |       |
| MdPME2             | AAGAACATGG | TCACTGCACA   | AGGTAGAACT   | GACCCGAATC | AAAACACCGG   | CATCGTGATC    | CAAAAATCGA | 1411  |
| MDP245813_cds_GDR  | AAGAACATGG | TCACTGCACA   | AGGTAGAACT   | GACCCGAATC | AAAACACCGG   | CATCGTGATC    | CAAAAATCGA | 1462  |
| MDP222620_cds_GDR  | - - - - -  | - - - - -    | - - - - -    | - - - - -  | - - - - -    | - - - - -     | - - - - -  | 1119  |
| AryANE_v1_00021521 | - - - - -  | - - - - -    | - - - - -    | - - - - -  | - - - - -    | - - - - -     | - - - - -  | 60    |
|                    |            | 1 480        |              | 1 500      |              | 1 520         |            | 1 540 |
| MdPME2             | GAATCGGGCG | CACTTCCGAC   | TTGCAAGCCT   | CAAAGAGCAG | CTTCAAAACG   | TTTTTGGGGA    | GGCCATGGAA | 1481  |
| MDP245813_cds_GDR  | GAATCGGGCG | CACTTCCGAC   | TTGCAAGCCT   | CAAAGAGCAG | CTTCAAAACG   | TTTTTGGGGA    | GGCCATGGAA | 1532  |
| MDP222620_cds_GDR  | - - - - -  | - - - - -    | - - - - -    | - - - - -  | - - - - -    | - - - - -     | - - - - -  | 1119  |
| AryANE_v1_00021521 | - - - - -  | - - - - -    | - - - - -    | - - - - -  | - - - - -    | - - - - -     | - - - - -  | 60    |
|                    |            | 1 560        |              | 1 580      |              | 1 600         |            |       |
| MdPME2             | GGAGTATTCA | AGGACTGTGA   | TCATGCAGTC   | GAGTATAACT | GATATCATTG   | ACCCTGCTGG    | ATGGCATGAG | 1551  |
| MDP245813_cds_GDR  | GGAGTATTCA | AGGACTGTGA   | TCATGCAGTC   | GAGTATAACT | GATATCATTG   | ACCCTGCTGG    | ATGGCATGAG | 1602  |
| MDP222620_cds_GDR  | - - - - -  | - - - - -    | - - - - -    | - - - - -  | - - - - -    | - - - - -     | - - - - -  | 1119  |
| AryANE_v1_00021521 | - - - - -  | - - - - -    | - - - - -    | - - - - -  | - - - - -    | - - - - -     | - - - - -  | 60    |
|                    |            | 1 620        |              | 1 640      |              | 1 660         |            | 1 680 |
| MdPME2             | TGGTCTGGCA | CTTTTGCCCT   | CGACACTTTG   | TTTTATGGAG | AGTATGCTAA   | CACTGGGGCA    | GGCGCTGGGA | 1621  |
| MDP245813_cds_GDR  | TGGTCTGGCA | CTTTTGCCCT   | CGACACTTTG   | TTTTATGGAG | AGTATGCTAA   | CACTGGGGCA    | GGCGCTGGGA | 1672  |
| MDP222620_cds_GDR  | - - - - -  | - - - - -    | - - - - -    | - - - - -  | - - - - -    | - - - - -     | - - - - -  | 1119  |
| AryANE_v1_00021521 | - - - - -  | - - - - -    | - - - - -    | - - - - -  | - - - - -    | - - - - -     | - - - - -  | 60    |
|                    |            | 1 700        |              | 1 720      |              | 1 740         |            |       |
| MdPME2             | CTGCAAACAG | GGTGACGTGG   | AAGGGGTTTA   | AGGTAATTAC | AAGTCCCACT   | GAGGCTGAGG    | CGTATACGCC | 1691  |
| MDP245813_cds_GDR  | CTGCAAACAG | GGTGACGTGG   | AAGGGGTTTA   | AGGTAATTAC | AAGTCCCACT   | GAGGCTGAGG    | CGTATACGCC | 1742  |
| MDP222620_cds_GDR  | - - - - -  | - - - - -    | - - - - -    | - - - - -  | - - - - -    | - - - - -     | - - - - -  | 1119  |
| AryANE_v1_00021521 | - - - - -  | - - - - -    | - - - - -    | - - - - -  | - - - - -    | - - - - -     | - - - - -  | 60    |
|                    |            | 1 760        |              | 1 780      |              | 1 800         |            |       |
| MdPME2             | GGGCAACTTT | ATTGCTGGTG   | GTAGTTGGTT   | GAGTTCTACC | GGTTTTCCAT   | TTTCTCTTGC    | GCTGTAA    | 1758  |
| MDP245813_cds_GDR  | GGGCAACTTT | ATTGCTGGTG   | GTAGTTGGTT   | GAGTTCTACC | GGTTTTCCAT   | TTTCTCTTGC    | GCTGTAA    | 1809  |
| MDP222620_cds_GDR  | - - - - -  | - - - - -    | - - - - -    | - - - - -  | - - - - -    | - - - - -     | - - - - -  | 1119  |
| AryANE_v1_00021521 | - - - - -  | - - - - -    | - - - - -    | - - - - -  | - - - - -    | - - - - -     | - - - - -  | 60    |
