# Supplementary material for: Multiscale investigation of mealiness in apple: an atypical role for a pectin methylesterase during fruit maturation
Source: PubMed Central journal article supplement (PMC4310206; doi:10.1186/s12870-014-0375-3), 2014-12-31

**Additional file 7. Degree of methylesterification (DM) of apple cell walls (2009, 2010) for mealy (M40, M74) and non-mealy hybrids (M20, M49) during the kinetic.**

Values are the means of 3 technical replicates for both years. Error bars represent the standard deviation.

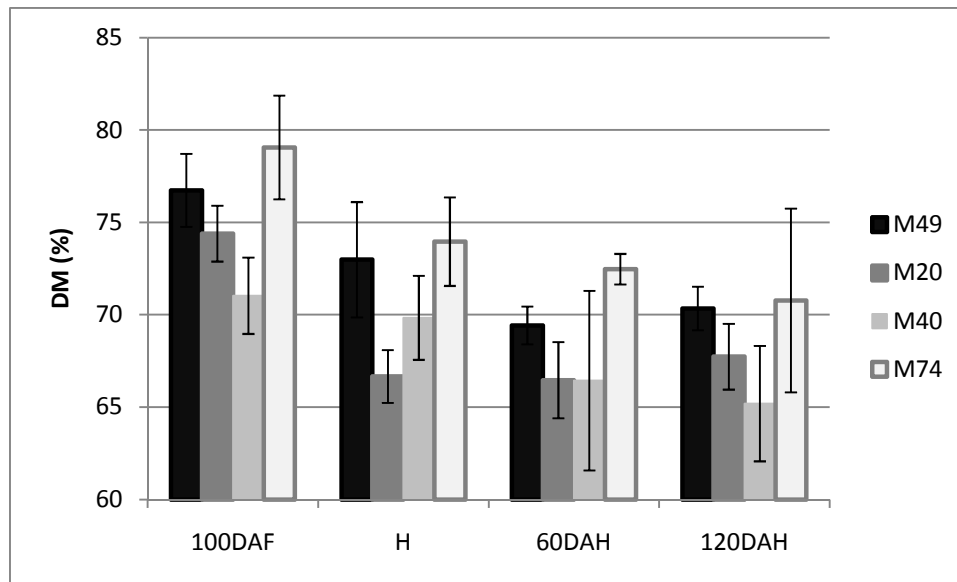

Supplement: 12870_2014_375_MOESM7_ESM.pdf [file 12870_2014_375_MOESM7_ESM.pdf]
