# Supplementary material for: Multiscale investigation of mealiness in apple: an atypical role for a pectin methylesterase during fruit maturation
Source: PubMed Central journal article supplement (PMC4310206; doi:10.1186/s12870-014-0375-3), 2014-12-31

Additional file 9. IM population within HIDRAS pedigree (adapted from Kouassi *et al.*, 2009).

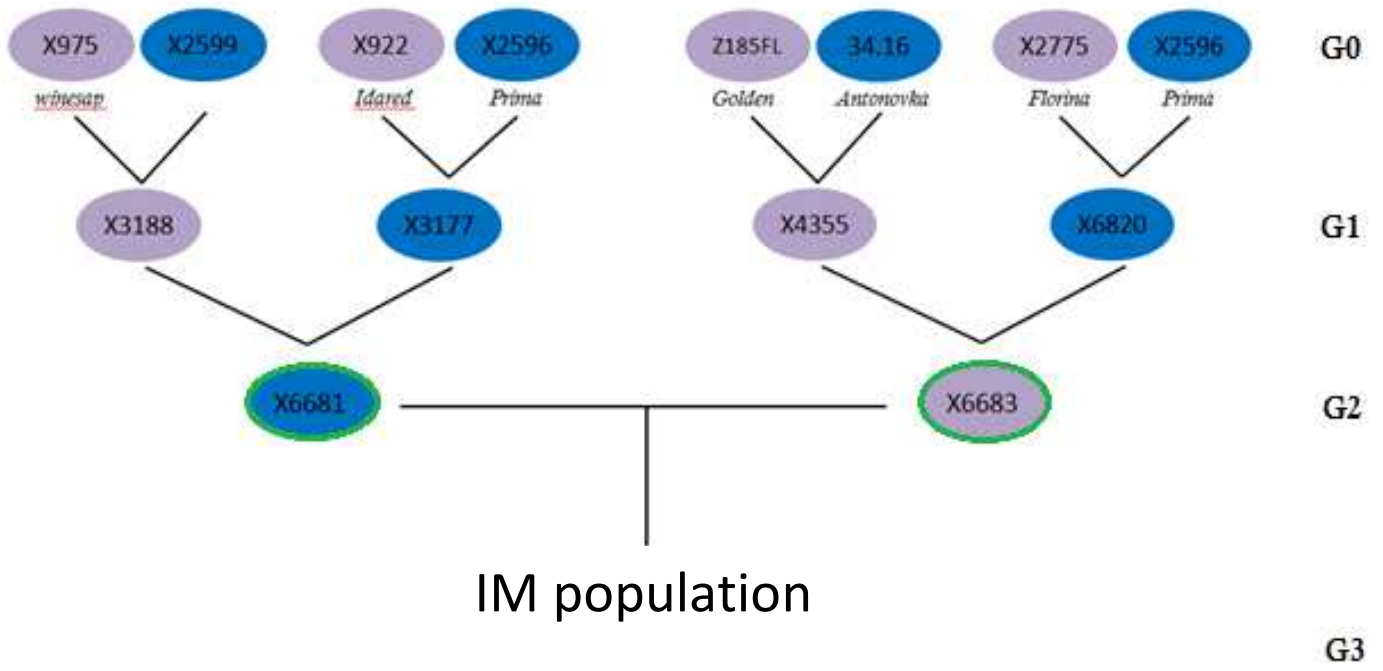

Supplement: 12870_2014_375_MOESM9_ESM.pdf [file 12870_2014_375_MOESM9_ESM.pdf]
