# Supplementary material for: Multiscale investigation of mealiness in apple: an atypical role for a pectin methylesterase during fruit maturation
Source: PubMed Central journal article supplement (PMC4310206; doi:10.1186/s12870-014-0375-3), 2014-12-31
Supplement: 12870_2014_375_MOESM10_ESM.pdf [file 12870_2014_375_MOESM10_ESM.pdf]

**Additional file 10. List of primers used for RT-qPCR and cloning.**

**S10.A** Primers used for the RT-qPCR. For each selected gene, the expression pattern obtained by microarray analysis is specified (up or down in mealy fruits compared to non-mealy). Three housekeeping genes (HK) were used to calculate the normalisation factor.

**S10.B** Primers used for *MdPME2* cloning.

**S10.A**

| Application    | Expression profil | MDP number    | Gene annotation                   | Size | Sequence (5' → 3')                                       |
|----------------|-------------------|---------------|-----------------------------------|------|----------------------------------------------------------|
| RT PCR         | Down              | MDP0000222620 | AtPME2                            | 104  | F: TTGAAAGTTGTGCTGCCATC<br>R: GACGTGCCGAAGAAAAAGAC       |
| RT PCR         | Down              | MDP0000322658 | UDP-glucuronosyl                  | 100  | F: TTGAATCAGCTTGTCTGAGTTGT<br>R: GGAATCATAAGCTTCCCAGATTT |
| RT PCR         | Down              | MDP0000393227 | FQR1                              | 184  | F: GCATAAGTTCCCGCACCATA<br>R: CCGCTGGAATTTTCTACAGC       |
| RT PCR         | Down              | MDP0000671440 | GDH1                              | 102  | F: GCAAACGCTTGAGATCTTCG<br>R: AGCACAGCTGATGACATGGA       |
| RT PCR         | Up                | MDP0000303194 | CRK10                             | 150  | F: TGTTGATCTTCCAGTACCCTCA<br>R: CCATGCAGCAGATATTTGACA    |
| RT PCR         | HK                | MDP0000271281 | porin, putative                   | 155  | F: CGCCCAAAATTATTGAAGCA<br>R: ATCCCAGCCATTGATTTTT        |
| RT PCR         | HK                | MDP0000217860 | drought-responsive family protein | 193  | F: ACGCAAGAGGAAGACAAGGA<br>R: GGGTGGCATGCTAACAAAAT       |
| RT PCR / sqPCR | HK                | MDP0000645828 | GADPH                             | 165  | F: ATCAATGAAGGACTGGAGAGG<br>R: GTCAGGTCAACAACGGAAAC      |

**S10.B**

| Application     | MDP number       | Gene annotation | Sequence (5' → 3')                                       |
|-----------------|------------------|-----------------|----------------------------------------------------------|
| sq PCR          | MDP0000222620    | AtPME2          | F: TCACGATGCTGTGGAGGAC<br>R: TGAAAGTTGTGCTGCCATCG        |
| sq PCR          | MDP0000245813    |                 | F: CCACGAGGCTGTGAGGAT<br>R: TGAAAGTTGTGCTGCCATCG         |
| 3' RACE<br>PCR1 | MdPME2<br>MdPME2 | PME<br>PME      | F6: CGATGGCAGCACAACCTTTCA<br>F5: AGAATGGCCAAAATCAAAGAGT  |
| nested PCR      | MdPME2<br>MdPME2 | PME<br>PME      | F1: CACCAGAATGGCCAAAATCAAAGAG<br>R: CAGCGCAAGAGAAAATGGAA |
